# Supplementary material for: CVD grown GaSbxN1−x films as visible-light active photoanodes
Source: Royal Society of Chemistry journal article supplement (doi:10.1039/d1dt02455h), 2021-01-01
Supplement: d1dt02455h1.pdf [file d1dt02455h1.pdf]

# Supplementary Information

## **CVD grown GaSb<sub>x</sub>N<sub>1-x</sub> films as visible-light active photoanodes.**

Dennis Zywitzki<sup>a</sup>, Dariusz Mitoraj<sup>b</sup>, Yury Vilk<sup>b</sup>, Oliver Mendoza Reyes<sup>b</sup>, Markus Schleuning<sup>c</sup>,  
Dennis Friedrich<sup>c</sup>, Alexander Sadlo<sup>a</sup>, Detlef Rogalla<sup>d</sup>, Rainer Eichberger<sup>c</sup>, Radim Beranek<sup>b</sup>,  
Anjana Devi<sup>a,\*</sup>

- a Inorganic Materials Chemistry, Ruhr University Bochum, Universitätsstr. 150, 44801 Bochum, Germany
- b Institute of Electrochemistry, Ulm University, Albert-Einstein-Allee 47, 89081 Ulm, Germany
- c Helmholtz-Zentrum Berlin for Materials and Energy, Hahn-Meitner-Platz 1, 14109 Berlin, Germany
- d RUBION, Ruhr University Bochum, Universitätsstr. 150, 44801 Bochum, Germany

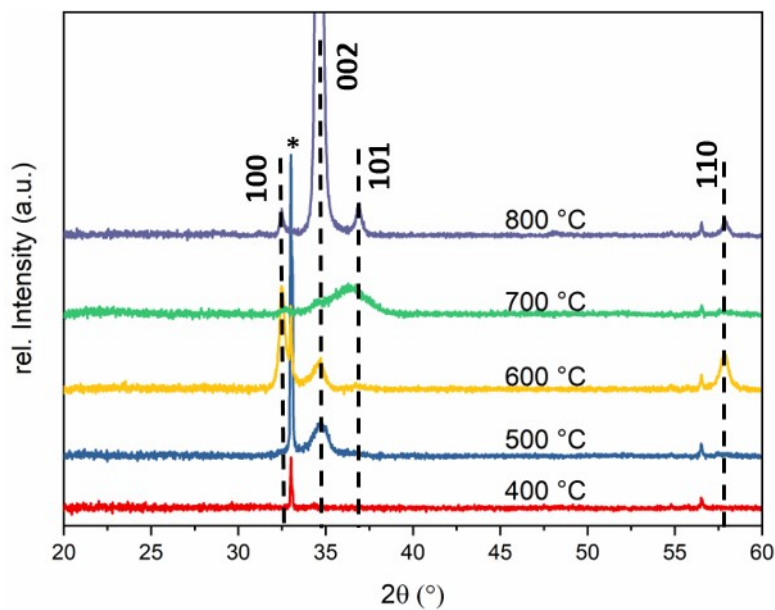

**Fig. S1:** X-ray diffraction patterns of GaN thin films deposited on Si(100) at different substrate temperatures using  $[\text{Ga}(\text{Me})(\text{dpamd})_2]$  and  $\text{NH}_3$  as precursors. (Reference: JCPDS No. 00-002-1078). The asterisk denotes the forbidden (002) reflex of the underlying Si.

**Table S1:** Composition (as determined via RBS/NRA) of GaN thin films grown on Si(100) as a function of deposition temperature .

| $T_{\text{dep}}$ (°C) | C (at.%) | N (at.%) | O (at.%) | Ga/N |
|-----------------------|----------|----------|----------|------|
| 400                   | 8.6      | 10.7     | 48.6     | 3    |
| 500                   | 5.2      | 41.0     | 6.1      | 1.2  |
| 600                   | 7.3      | 40.6     | 3.5      | 1.2  |
| 700                   | 7.9      | 41.5     | 2.6      | 1.2  |
| 800                   | 2.5      | 43.2     | 3.8      | 1.2  |

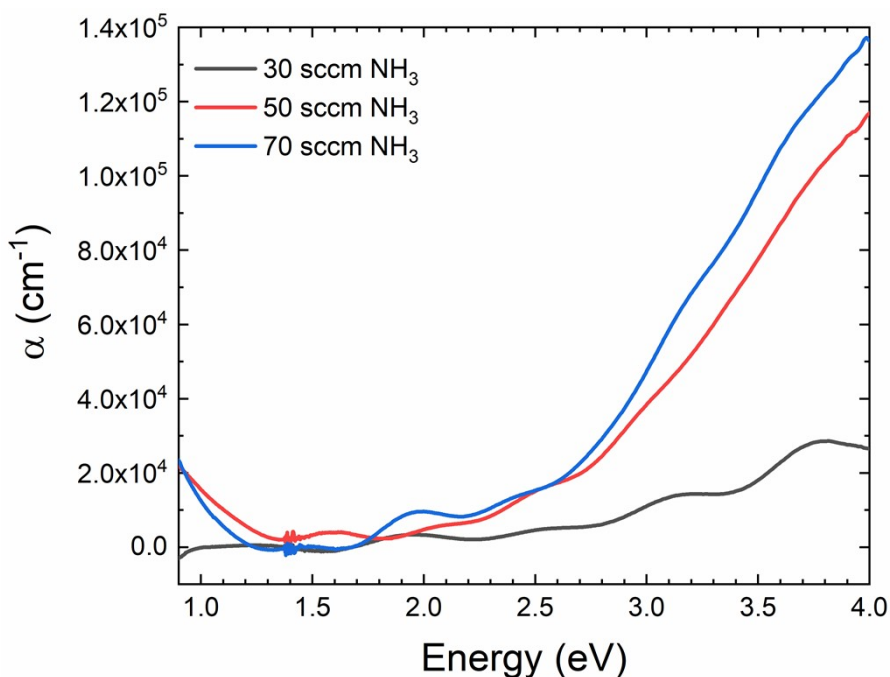

**Fig. S2:** Absorption coefficient for the  $\text{GaSb}_x\text{N}_{1-x}$  thin films on FTO substrates deposited at  $600^\circ\text{C}$ .

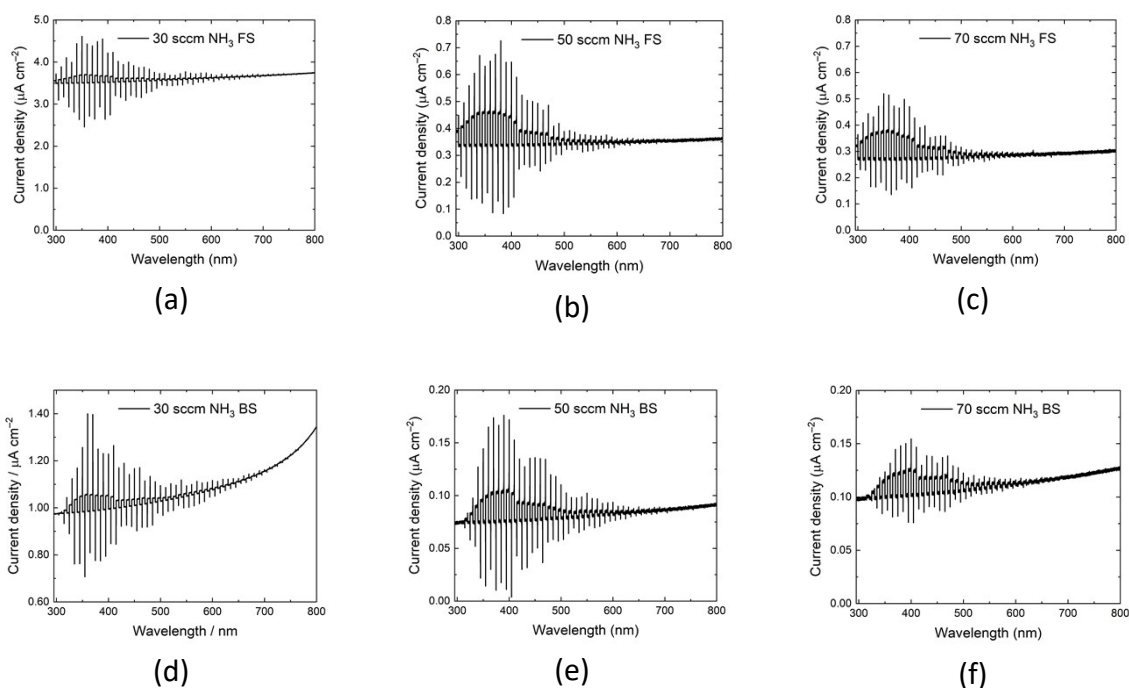

**Fig. S3:** Wavelength dependent photocurrent transients for  $\text{GaSb}_x\text{N}_{1-x}$  thin films measured at  $1.25\text{ V vs. RHE}$  in borate buffer ( $0.1\text{ M}$ ,  $\text{pH } 9.2$ ) containing  $0.1\text{ M Na}_2\text{SO}_3$  under intermittent monochromatic irradiation ( $5\text{ s light, } 5\text{ s dark}$ ) for the thin films on FTO (prepared at  $600^\circ\text{C}$ ) from the (a)-(c) front side (FS) and (d)-(f) back side (BS).

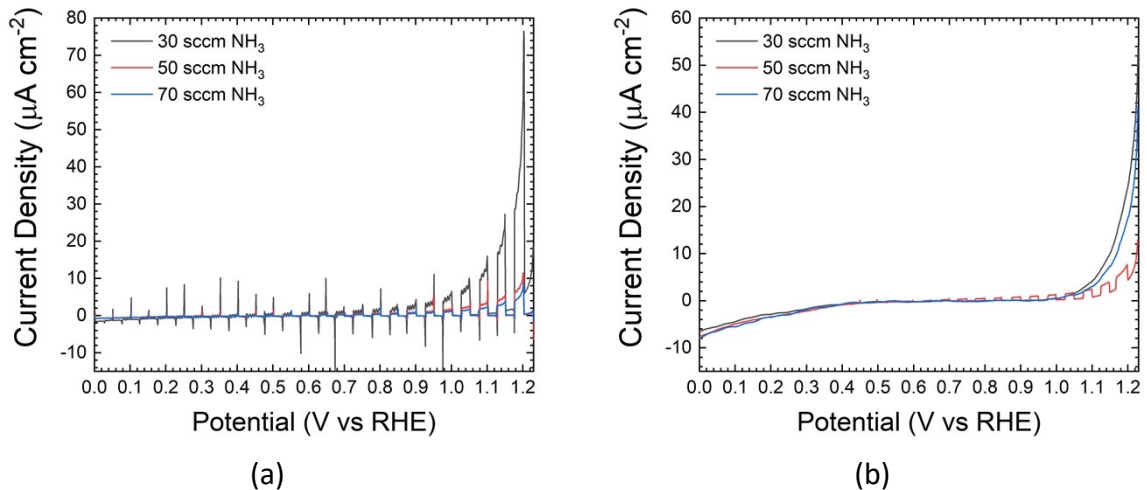

**Fig. S4:** Potential-dependent photocurrent for  $\text{GaSb}_x\text{N}_{1-x}$  thin films measured at thin electrodes in borate buffer (0.1 M, pH 9.2) in the presence of 0.1 M  $\text{Na}_2\text{SO}_3$  under intermittent (5 s light / 5 s dark) solar irradiation (Xe-Lamp with a AM-1.5G filter, 100  $\text{mW/cm}^2$ ) (a) thin films on FTO, prepared at 600 °C and illuminated from the back (substrate) side, (b) thin films on GC (glassy carbon), prepared at 800 °C and illuminated from the front (electrolyte) side.

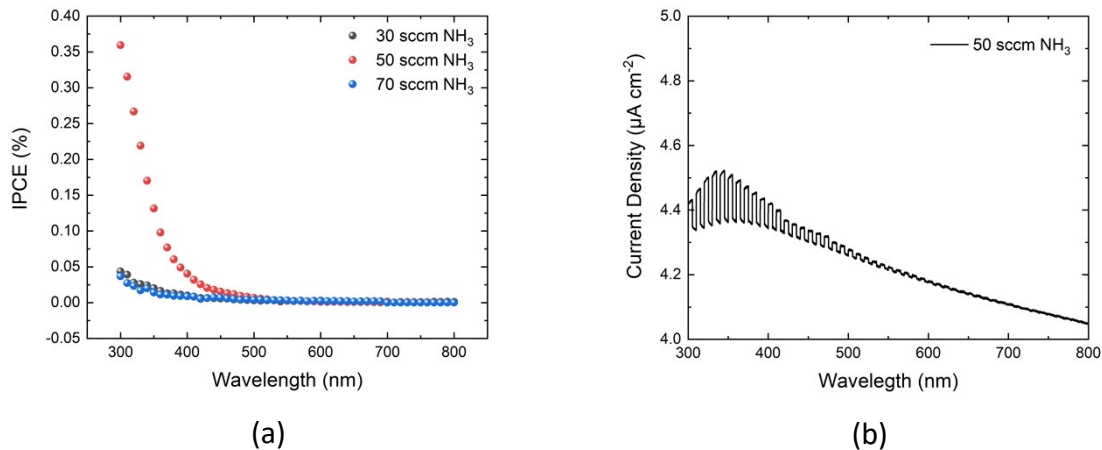

**Fig. S5:** (a) Photoaction spectra of the  $\text{GaSb}_x\text{N}_{1-x}$  thin films deposited on glassy carbon substrates (prepared at 800 °C) measured at 1.25 V vs. RHE in borate buffer (0.1 M, pH 9.2) with addition of  $\text{Na}_2\text{SO}_3$  (0.1 M) under intermittent monochromatic irradiation from the frontside (FS) (600 s idle at beginning, next 5 s light / 5 s dark), (b) corresponding photocurrent transients measured at the same conditions with interval of 10 nm.
